# Supplementary material
Source: HighWire-hosted journal article supplement (https://mbio.asm.org/content/5/4/e01398-14)
Supplement: inline-supplementary-material-3 [file inline-supplementary-material-3.pdf]

| Gene    | VIMSS ID | Name                           | TSS (this study)  | TSS (ref.)  | Methodology      | Ref.   | Note                                                                                                                                                                                                                                        |
|---------|----------|--------------------------------|-------------------|-------------|------------------|--------|---------------------------------------------------------------------------------------------------------------------------------------------------------------------------------------------------------------------------------------------|
| SO_1778 | 200941   | <i>mtrC</i><br><i>/omcB</i>    | -119              | -119        | 5' RACE          | [1]    |                                                                                                                                                                                                                                             |
| SO_2426 | 201570   |                                | -25               | -25,<br>-27 | 5' RACE          | [2, 3] | Both -27 and -25 are high confidence and conserved; the log-odds for -27 is lower than -25                                                                                                                                                  |
| SO_1342 | 200517   | <i>rpoE</i>                    | -58, -90,<br>-173 | -58         | 5' RACE          | [4]    |                                                                                                                                                                                                                                             |
| SO_1427 | 200602   | <i>dmsAB-1</i><br><i>/dmsE</i> | NA                | 44          | 5' RACE          | [4]    | No peak detected - <i>dms</i> operon is not highly expressed in rich/minimal media                                                                                                                                                          |
| SO_1126 | 200306   | <i>dnaK</i>                    | -127              | -37         | 5' RACE          | [4]    | Our dataset detected low-confidence TSS at -37 site; <i>dnaK</i> is induced at heat shock, but we don't have 5'RNA-seq data on heat shock condition                                                                                         |
| SO_3585 | 202682   | <i>azr</i>                     | NA                | -26         | 5' RACE          | [5]    | Our dataset detected low-confidence TSS at -26 site with moderate number of 5'RNA-seq reads mapped; <i>azr</i> is known to involved in growth under heavy metal conditions, and did not express in any of our tiling microarray conditions. |
| SO_1228 | 200406   | <i>torR</i>                    | -23, -159         | -23         | primer extension | [6]    | Log-odds for -23 peak was 8.12, which is slightly lower than the cutoff used in this analysis (lo >= 10)                                                                                                                                    |
| SO_4694 | 203763   | <i>torF</i>                    | NA                | -36         | primer extension | [6]    | Within our five growth conditions in microarray experiments, <i>torF</i> is only expressed in DMSO, which does not have 5'RNA-seq data.                                                                                                     |
| SO_1234 | 200412   | <i>torECAD</i>                 | NA                | -33         | primer extension | [7]    | Same as above (only expressed in DMSO which does not have 5'RNA-seq data)                                                                                                                                                                   |
| SO_4180 | 203263   | <i>mxDA</i>                    | -184              | -150        | primer extension | [8]    | It's suggested that <i>mxDA</i> operon is induced at starvation and <i>mxDA</i> is expressed in minimal medium in our experiments.                                                                                                          |

## References

1. Beliaev AS, Saffarini DA, McLaughlin JL, Hunnicutt D: **MtrC, an outer membrane decahaem c cytochrome required for metal reduction in *Shewanella putrefaciens* MR-1.** *Mol Microbiol* 2001, **39**(3):722-730.
2. Chourey K, Wei W, Wan XF, Thompson DK: **Transcriptome analysis reveals response regulator SO2426-mediated gene expression in *Shewanella oneidensis* MR-1 under chromate challenge.** *BMC Genomics* 2008, **9**:395.
3. Henne KL, Wan XF, Wei W, Thompson DK: **SO2426 is a positive regulator of siderophore expression in *Shewanella oneidensis* MR-1.** *BMC Microbiol* 2011, **11**:125.

4. Gassman NR, Ho SO, Korlann Y, Chiang J, Wu Y, Perry LJ, Kim Y, Weiss S: **In vivo assembly and single-molecule characterization of the transcription machinery from *Shewanella oneidensis* MR-1.** *Protein Expr Purif* 2009, **65**(1):66-76.
5. Mugerfeld I, Law BA, Wickham GS, Thompson DK: **A putative azoreductase gene is involved in the *Shewanella oneidensis* response to heavy metal stress.** *Appl Microbiol Biotechnol* 2009, **82**(6):1131-1141.
6. Bordi C, Ansaldi M, Gon S, Jourlin-Castelli C, Iobbi-Nivol C, Mejean V: **Genes regulated by TorR, the trimethylamine oxide response regulator of *Shewanella oneidensis*.** *J Bacteriol* 2004, **186**(14):4502-4509.
7. Gon S, Patte JC, Dos Santos JP, Mejean V: **Reconstitution of the trimethylamine oxide reductase regulatory elements of *Shewanella oneidensis* in *Escherichia coli*.** *J Bacteriol* 2002, **184**(5):1262-1269.
8. Muller J, Shukla S, Jost KA, Spormann AM: **The mxd operon in *Shewanella oneidensis* MR-1 is induced in response to starvation and regulated by ArcS/ArcA and BarA/UvrY.** *BMC Microbiol* 2013, **13**:119.
